# Supplementary material
Source: PubMed Central journal article supplement (PMC5642647)
Supplement: NIHMS74289-supplement-SI_file.pdf [file NIHMS74289-supplement-SI_file.pdf]

Supplementary information for:

## Multi vesicular droplets: A cell model system to study vesicle compartmentalised biochemical reactions

N. Nuti, P. E. Verboket, P. S. Dittrich

*Department of Biosystems Science and Engineering, ETH Zürich, Basel, 4058, Switzerland.*

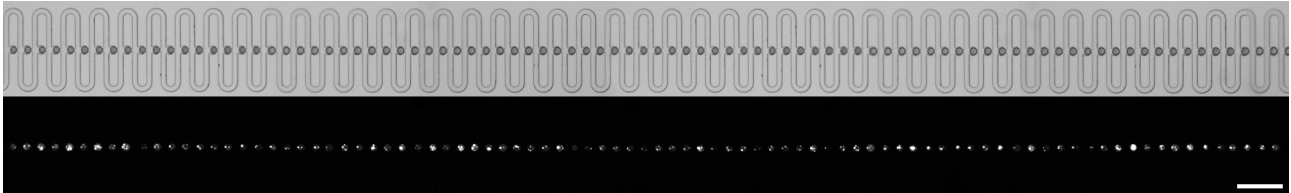

Figure S1: Panoramic view and detail of the 89-trap array. First row: bright field microscopy picture. Four images of the same experiment were stitched together to create a high-resolution panoramic image. The droplets are filled with blue food dye for better visualization. Second row: fluorescence microscopy picture of the same array. The vesicles are filled with fluorescent calcein. Scale bar 250  $\mu\text{m}$ .

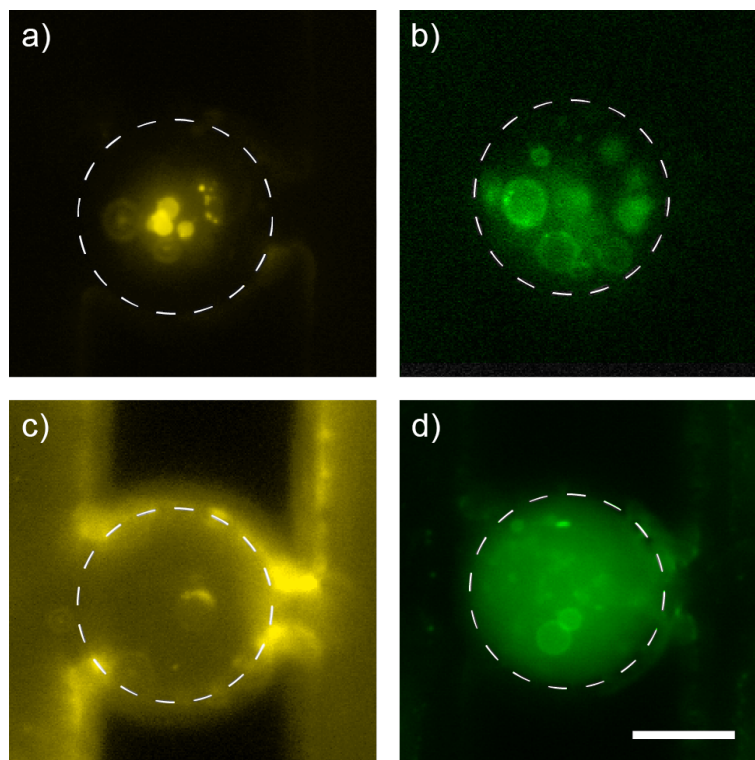

Figure S2: Fluorescent images of labelled vesicles in droplets. The staining was performed off-chip with Dil (a) or Alexa Fluor 488 conjugated streptavidin (b), and on-chip with Dil (c) or Alexa Fluor 488 conjugated streptavidin (d). The dashed lines are indicating the extents of the droplets, determined by bright-field images. All the images were taken immediately after trapping. Scale bar 25  $\mu\text{m}$ .

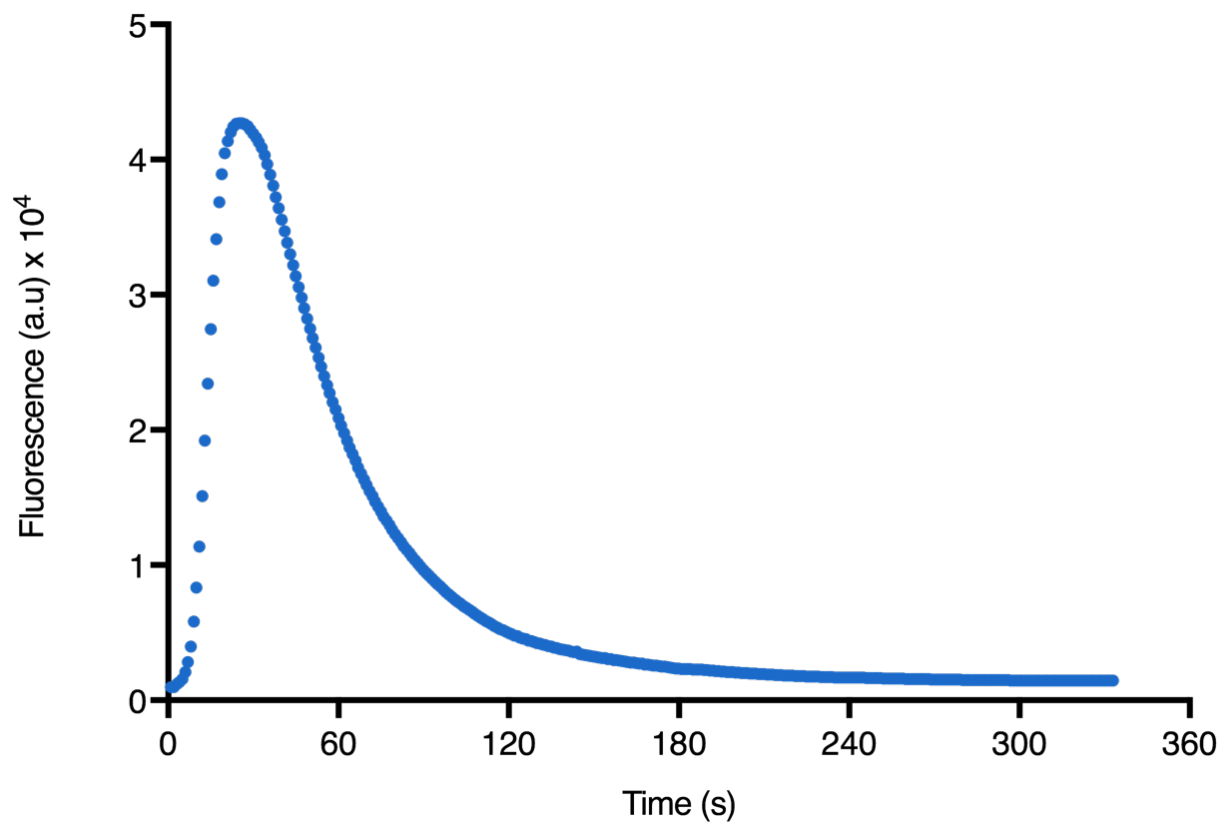

Figure S3: Plot of the mean pixel intensity of a single droplet over time. The droplet was imaged over a longer time to observe its photobleaching curve ( $n=1$ ). The parameters of the experiment are the same described for Figure 5d.

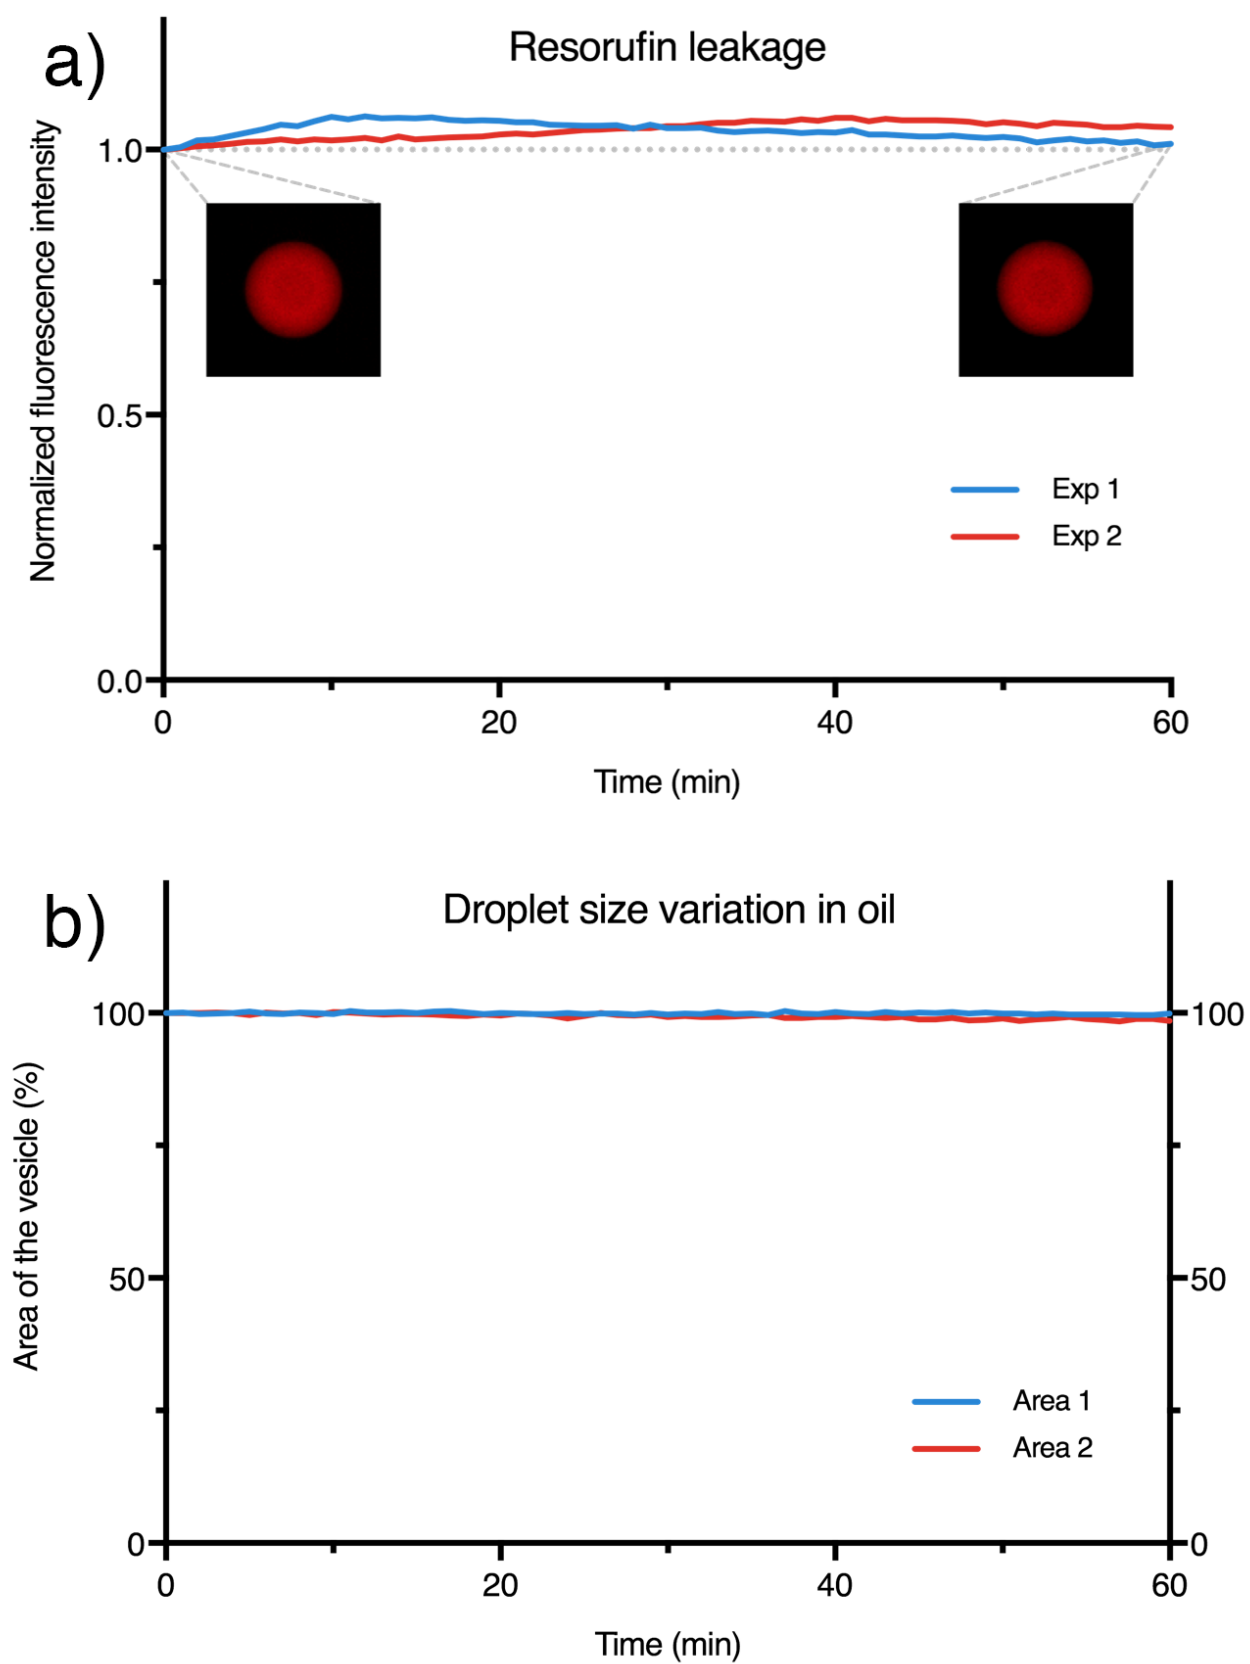

Figure S4: a) Quantification of the resorufin leakage from droplets in fluorinated oil. The droplets contained  $33.3 \mu\text{M}$  of Resorufin and were imaged with ultrashort flashes (0.02 s) of low intensity fluorescence every 60 seconds for 1 hr, in order to minimize photobleaching. b) Plot of the droplet area over time. The observed droplets are the same of the top graph.
